# Supplementary material
Source: PubMed Central journal article supplement (PMC2863990)
Supplement: NIHMS144407-supplement-Appendix.pdf [file NIHMS144407-supplement-Appendix.pdf]

## Appendix: Myocardial Infarction Ascertainment and Definition

The BARI 2D protocol required that each patient have a 12-lead ECG at baseline, before the initial revascularization procedure, post procedure generally before hospital discharge, 3 months after randomization, and annually thereafter. Additional ECGs were required in patients who underwent subsequent coronary revascularization procedures (before and after the procedure) and in cases of suspected ischemic events.

All ECGs were interpreted at the Saint Louis University Central ECG and Myocardial Infarction Classification Laboratory. With the use of the Minnesota code criteria, each ECG was coded independently by trained central laboratory staff blinded to the patient's clinical history and treatment assignment. Serial comparison of sequential tracings was performed with the use of a modified Novacode system to identify patients with new ECG changes in the Minnesota Code<sup>36, 37</sup>. The modified Novacode adjusts for nonsignificant Minnesota Code Q-wave changes that result from minimal biological or technical procedural variations in the QRS waveform.

Acute coronary syndrome events requiring hospitalization were classified as Q-wave MI, non-Q-wave MI, unstable angina with new ECG changes, or none of the above. The MI criteria used were modified from the universal MI definition in that a two fold elevation of abnormal biomarker profile above the upper limits of normal was used rather than the 99<sup>th</sup> percentile. This modification enhances specificity but reduces sensitivity. When cardiac troponin and CKMB were simultaneously acquired, cardiac troponin took precedence over CKMB in establishing the diagnosis. Myocardial infarction was confirmed if abnormal cardiac biomarkers occurred and there was evidence of angina or angina equivalent symptoms, or ECG or imaging evidence of new myocardial ischemia. Cardiac biomarkers were not routinely collected after coronary revascularization. When

they were collected, a 3 fold elevation in CKMB following a PCI procedure and a 10 fold increase in CKMB following coronary bypass surgery were used as the cut-points to define abnormality.

Q-wave MI required the development of new pathologic Q waves as defined above or the new occurrence of a left bundle branch block in addition to abnormal biomarkers.

Silent Q-wave MI was recorded when new pathologic Q waves were detected during a regularly scheduled follow-up ECG and were counted as a new Q wave MI, as were the presence of new pathologic Q waves following a coronary revascularization procedure.

A non Q-wave MI met the MI criteria minus new pathologic Q waves. Unstable angina was defined by the presence of angina or angina equivalent symptoms accompanied by hospitalization and new ECG changes.

**Table 1 Appendix: Baseline Characteristics of BARI 2D Patients by Randomized Treatment Groups and Intended Method of Revascularization Strata**

| Characteristic                         | BARI 2D Patients<br>N=2368 | Randomized Treatment Groups |                             |                                 |                             | Revascularization Strata       |                                |
|----------------------------------------|----------------------------|-----------------------------|-----------------------------|---------------------------------|-----------------------------|--------------------------------|--------------------------------|
|                                        |                            | Prompt Revasc<br>N=1176     | Intensive Medical<br>N=1192 | Insulin Sensitization<br>N=1183 | Insulin Provision<br>N=1185 | PCI Intended Stratum<br>N=1605 | CABG Intended Stratum<br>N=763 |
| Age at study entry, mean, SD           | 62.4, 8.9                  | 62.3, 8.8                   | 62.4, 9.0                   | 62.3 9.2                        | 62.5, 8.7                   | 62.0, 9.1                      | 63.2, 8.4,                     |
| Male, %                                | 70.4                       | 70.4                        | 70.3                        | 70.1                            | 70.6                        | 67.8                           | 75.8                           |
| Race/Ethnicity, %                      |                            |                             |                             |                                 |                             |                                |                                |
| White non-Hispanic                     | 65.9                       | 65.1                        | 66.6                        | 66.0                            | 65.7                        | 63.6                           | 70.6                           |
| Black non-Hispanic                     | 16.8                       | 17.3                        | 16.3                        | 16.7                            | 17.0                        | 19.8                           | 10.5                           |
| Hispanic                               | 12.5                       | 12.8                        | 12.3                        | 12.1                            | 13.0                        | 11.7                           | 14.3                           |
| Asian non-Hispanic / Other             | 4.8                        | 4.8                         | 4.8                         | 5.2                             | 4.3                         | 4.9                            | 4.6                            |
| Region of world, %                     |                            |                             |                             |                                 |                             |                                |                                |
| USA                                    | 63.3                       | 63.2                        | 63.4                        | 63.1                            | 63.5                        | 73.7                           | 41.4                           |
| Canada                                 | 14.9                       | 14.9                        | 14.9                        | 15.0                            | 14.9                        | 13.6                           | 17.6                           |
| Brazil                                 | 15.0                       | 15.1                        | 14.9                        | 15.0                            | 15.0                        | 7.9                            | 30.0                           |
| Mexico                                 | 3.6                        | 3.6                         | 3.6                         | 3.6                             | 3.6                         | 2.1                            | 6.8                            |
| Czech Republic/Austria                 | 3.2                        | 3.2                         | 3.1                         | 3.3                             | 3.0                         | 2.7                            | 4.2                            |
| HbA1c, % mean, SD                      | 7.7, 1.6                   | 7.6,1.6                     | 7.7,1.6                     | 7.6,1.6                         | 7.7, 1.6                    | 7.6, 1.6                       | 7.7, 1.7                       |
| Duration of diabetes, years mean, SD   | 10.4, 8.7                  | 10.2,8.5                    | 10.7,8.8                    | 10.1, 8.4                       | 10.8, 8.9                   | 10.4, 8.8                      | 10.5, 8.4                      |
| Currently taking insulin, %            | 27.9                       | 27.1                        | 28.7                        | 27.4                            | 28.3                        | 30.5                           | 22.4                           |
| History of myocardial infarction, %    | 32.0                       | 31.7                        | 32.4                        | 32.6                            | 31.5                        | 30.1                           | 36.0                           |
| History of congestive heart failure, % | 6.6                        | 7.1                         | 6.2                         | 6.7                             | 6.6                         | 7.7                            | 4.5                            |
| Cerebrovascular accident TIA, %        | 9.8                        | 9.5                         | 10.0                        | 9.9                             | 9.6                         | 10.5                           | 8.2                            |
| Peripheral artery disease, %           | 23.7                       | 23.7                        | 23.7                        | 23.9                            | 23.5                        | 23.9                           | 23.5                           |
| Angina category (within 6 weeks),%*    |                            |                             |                             |                                 |                             |                                |                                |
| Stable Angina 1, 2                     | 42.5                       | 40.8                        | 44.2                        | 42.8                            | 42.3                        | 41.3                           | 45.0                           |
| Stable Angina 3, 4                     | 8.6                        | 10.2                        | 7.1                         | 8.6                             | 8.6                         | 7.9                            | 10.1                           |
| Unstable Angina                        | 9.5                        | 11.3                        | 7.7                         | 9.7                             | 9.4                         | 10.7                           | 7.0                            |
| Angina equivalents and no angina       | 21.4                       | 21.5                        | 21.3                        | 20.8                            | 22.0                        | 22.3                           | 19.6                           |
| No angina nor angina equivalents       | 17.9                       | 16.1                        | 19.7                        | 18.1                            | 17.8                        | 17.7                           | 18.4                           |
| Prior revascularization, %             | 23.6                       | 22.9                        | 24.2                        | 23.1                            | 24.1                        | 28.6                           | 13.0                           |
| Triple Vessel Disease, %               | 30.7                       | 31.0                        | 30.4                        | 30.7                            | 30.7                        | 20.3                           | 52.4                           |
| Proximal LAD Disease, %                | 13.2                       | 13.2                        | 13.3                        | 12.1                            | 14.4                        | 10.3                           | 19.4                           |
| LV Ejection Fraction < 50%, %          | 17.5                       | 17.4                        | 17.5                        | 18.4                            | 16.6                        | 17.5                           | 17.5                           |

\* Angina category comparison between Prompt Revasc / Intense Medical group, p=0.0003

**Table 2 Appendix: Event Counts and Percent of Patients with Events by Randomized Treatment and Intended Revascularization Strata**

|                     | <b>Prompt Revasc</b> | <b>Intensive Medical</b> | <b>Insulin Sensitization</b> | <b>Insulin Provision</b> | <b>Rev-IS</b> | <b>Med-IS</b> | <b>Rev-IP</b> | <b>Med-IP</b> |
|---------------------|----------------------|--------------------------|------------------------------|--------------------------|---------------|---------------|---------------|---------------|
| <b>All Patients</b> | N=1176               | N=1192                   | N=1183                       | N=1185                   | N=584         | N=599         | N=592         | N=593         |
| Death               | 155(13.2%)           | 161(13.5%)               | 156(13.2%)                   | 160(13.5%)               | 75(12.8%)     | 81(13.5%)     | 80(13.5%)     | 80(13.5%)     |
| MI                  | 118(10.0%)           | 138(11.6%)               | 118(10.0%)                   | 138(11.7%)               | 51(8.7%)      | 67(11.2%)     | 67(11.3%)     | 71(12.0%)     |
| Stroke              | 30 (2.6%)            | 33 (2.8%)                | 27(2.3%)                     | 36 (3.0%)                | 13(2.2%)      | 14(2.3%)      | 17(2.9%)      | 19(3.2%)      |
| Death/MI/Stroke     | 266(22.6%)           | 283(23.7%)               | 261(22.1%)                   | 288(24.3%)               | 121(20.7%)    | 140(23.4%)    | 145(24.5%)    | 143(24.1%)    |
| <b>PCI Stratum</b>  | N=798                | N=807                    | N=804                        | N=801                    | N=396         | N=408         | N=402         | N=399         |
| Death               | 102(12.8%)           | 96(11.9%)                | 101(12.6%)                   | 97(12.1%)                | 49(12.4%)     | 48(11.8%)     | 53(13.2%)     | 48(12.0%)     |
| MI                  | 90(11.3%)            | 82(10.2%)                | 81 (10.1%)                   | 91(11.4%)                | 42(10.6%)     | 39(9.6%)      | 48(11.9%)     | 43(10.8%)     |
| Stroke              | 23(2.9%)             | 23(2.9%)                 | 19(2.4%)                     | 27 (3.4%)                | 9 (2.3%)      | 10(2.5%)      | 14(3.5%)      | 13(3.3%)      |
| Death/MI/Stroke     | 187(23.4%)           | 168(20.8%)               | 169(21.0%)                   | 186(23.2%)               | 88(22.2%)     | 81(19.9%)     | 99(24.6%)     | 87(21.8%)     |
| <b>CABG Stratum</b> | N=378                | N=385                    | N=379                        | N=384                    | N=188         | N=191         | N=190         | N=194         |
| Death               | 53(14.0%)            | 65(16.9%)                | 59(15.6%)                    | 59(15.4%)                | 26(13.8%)     | 33(17.3%)     | 27(14.2%)     | 32(16.5%)     |
| MI                  | 28(7.4%)             | 56(14.6%)                | 37(9.8%)                     | 47(12.2%)                | 9(4.8%)       | 28(14.7%)     | 19(10.0%)     | 28(14.4%)     |
| Stroke              | 7(1.9%)              | 10(2.6%)                 | 8(2.1%)                      | 9(2.3%)                  | 4(2.1%)       | 4(2.1%)       | 3(1.6%)       | 6(3.1%)       |
| Death/MI/Stroke     | 79(20.9%)            | 115(29.9%)               | 92(24.3%)                    | 102(26.6%)               | 33(17.6%)     | 59(30.9%)     | 46(24.2%)     | 56(28.9%)     |

## Appendix S Figure Legends

### Figure S1:

The Consort chart depicting the number of patients randomly assigned to each of the four mutually exclusive treatment groups. For the 3 year and the 5 year follow-up clinic visit, patients are categorized as having completed the appropriate visit or according to the reason that the visit was not completed.

### Figure S2:

The estimated percent of patients who underwent revascularization in the prompt revascularization (Panel A solid line) and the intensive medical (Panel A dashed line) randomized treatment groups over five years of follow-up. The percent of active patients receiving any IS drug (blue bars) and any IP drug (red bars) at the baseline, 1, 3, and 5 year visits for the Insulin Sensitization (Panel B) and the Insulin Provision (Panel C) randomized treatment groups. For each group and time, the mean HbA1c is presented below the bars.

**Figure S1 Appendix**

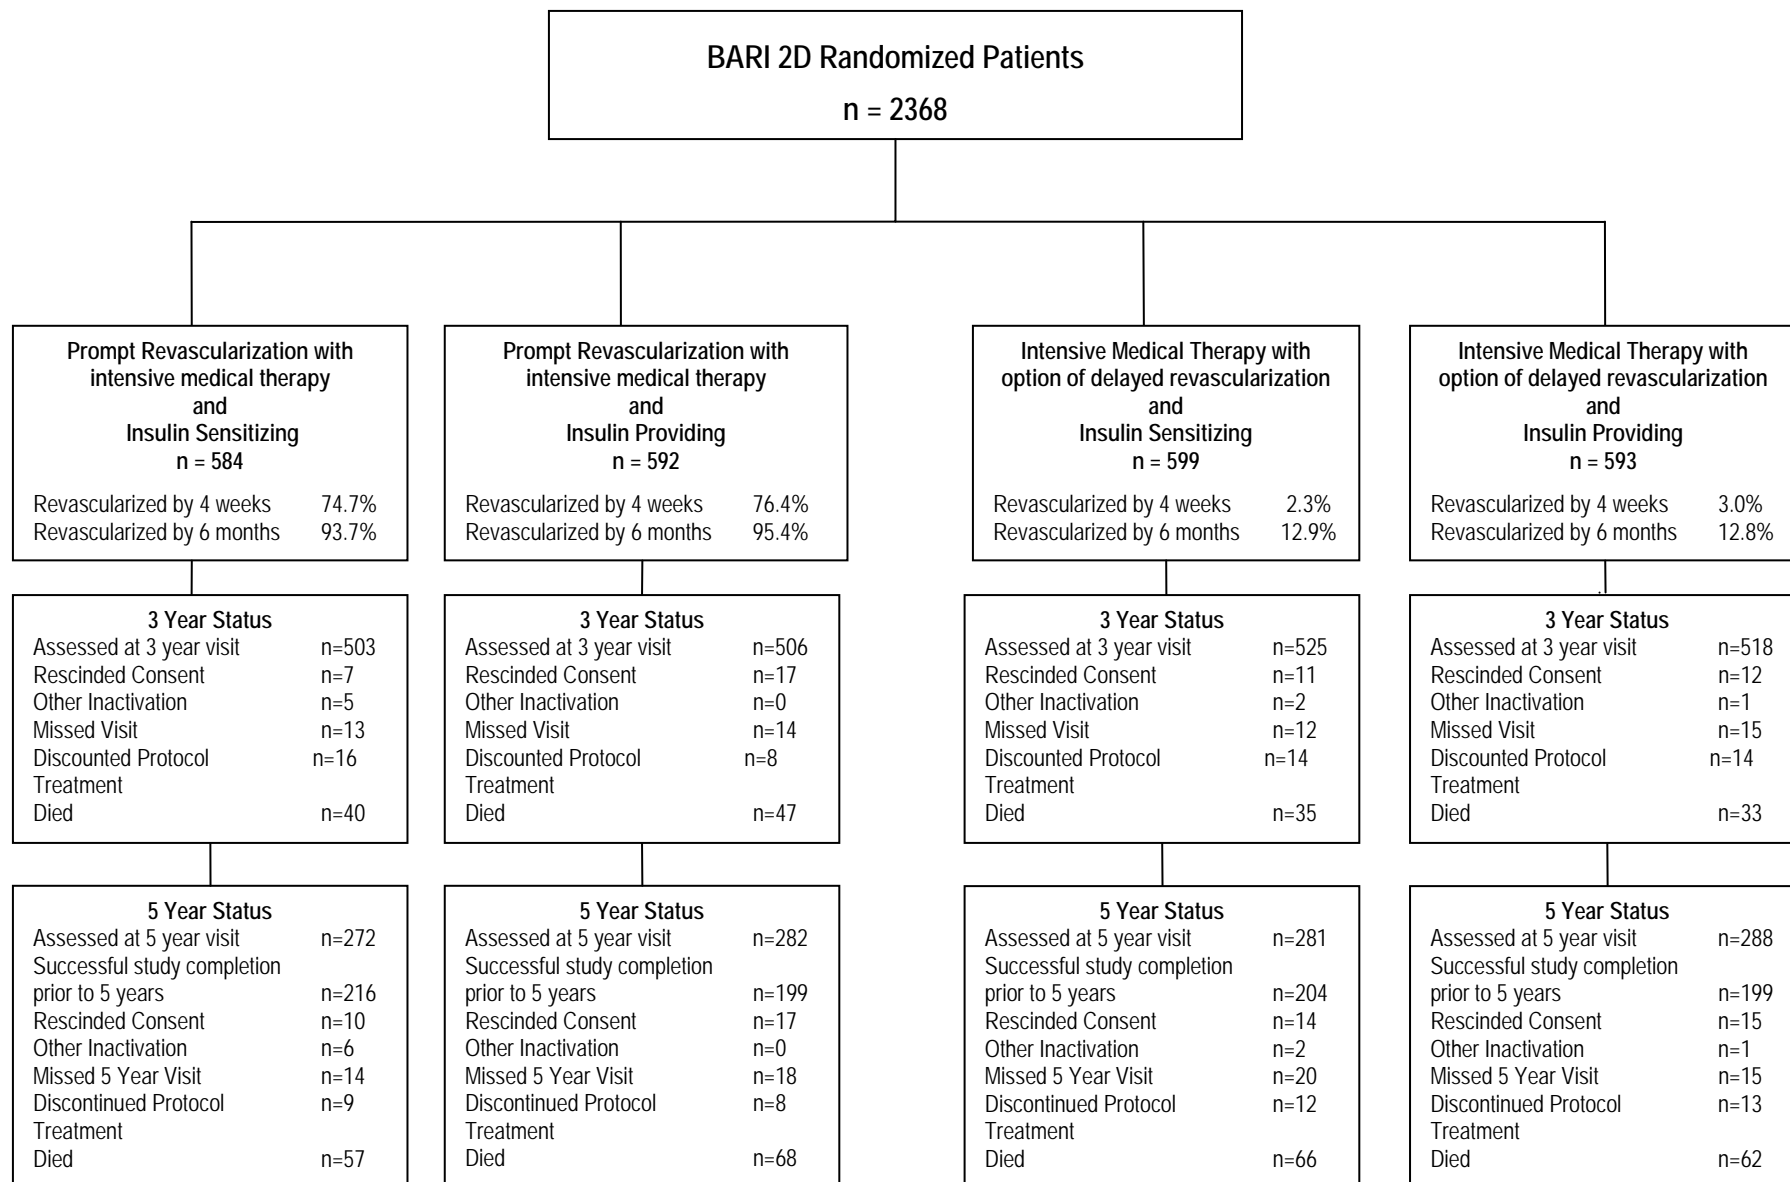

**Figure 2 Appendix**

**A**

**Cumulative Rate of the First Revascularization**

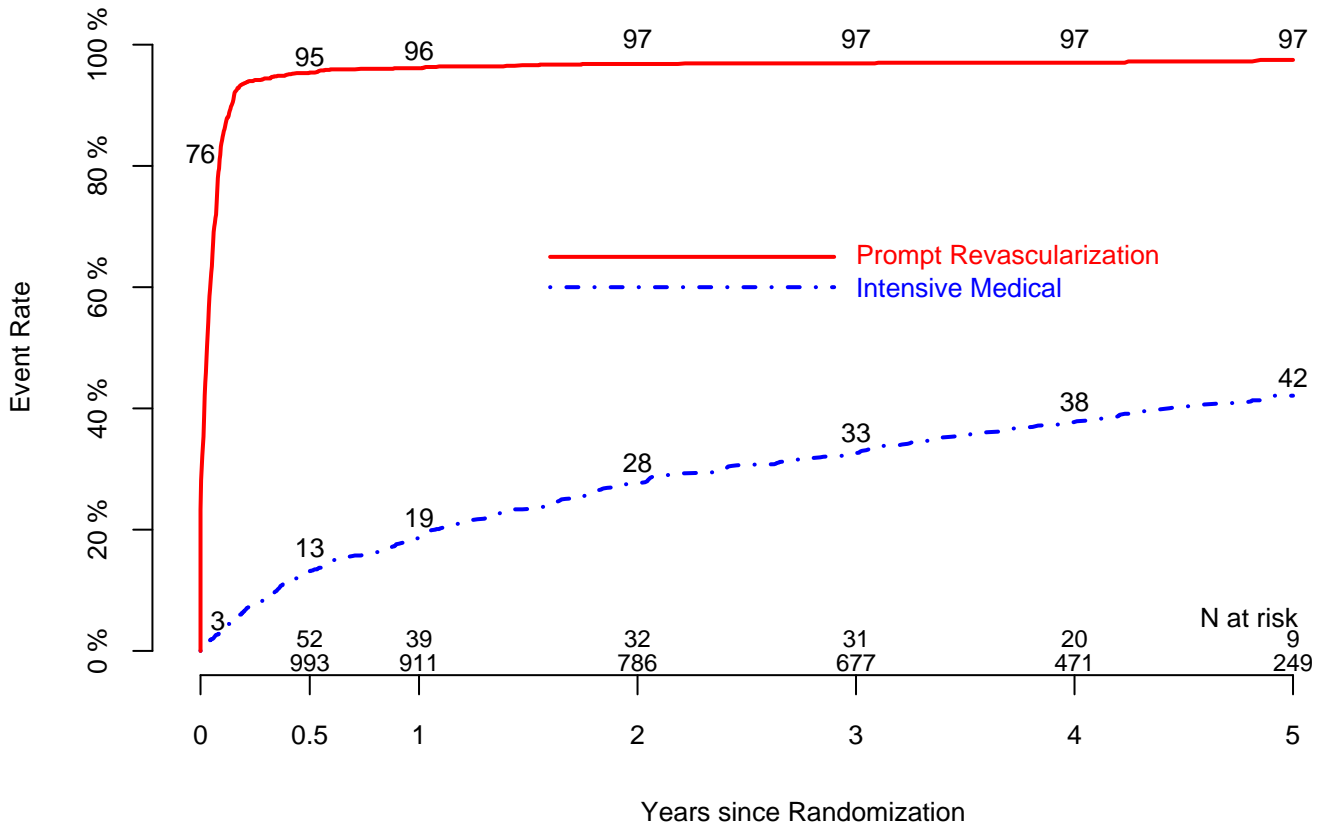

**Drug use by Randomized Treatment Assignment**

**B**

**Insulin Sensitization Group**

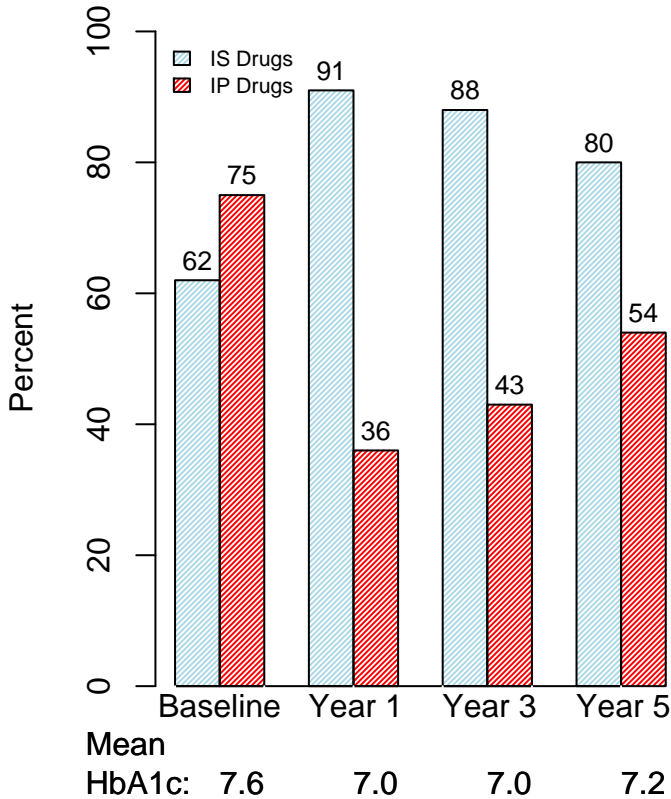

**C**

**Insulin Provision Group**

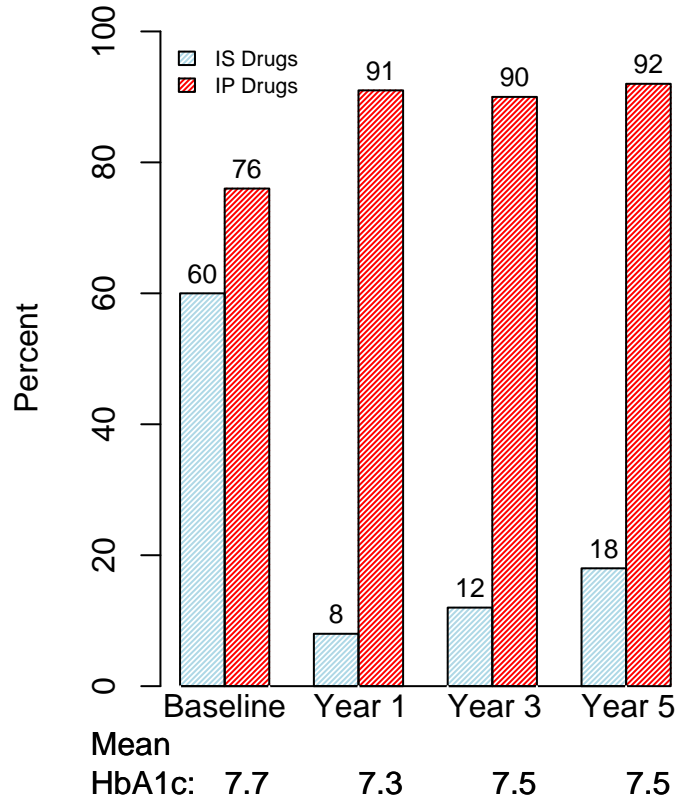

Appendix:

**The BARI 2D Study Group:**

**University of Pittsburgh, Pittsburgh, PA (Coordinating Center):** (Principal Investigator) Katherine M. Detre, MD, DrPH<sup>†</sup>, Sheryl F. Kelsey, PhD (Co-Principal Investigator) Maria Mori Brooks, PhD (Co-Investigators) Trevor J. Orchard, MBBCh, MMedSci, Stephen B. Thomas, PhD, Kim Sutton Tyrrell, RN, DrPH, Jamal S. Rana, MD, PhD (Coordinator) Frani Averbach, MPH, RD (Administrative Coordinators) Joan M. MacGregor, MS, Scott M. O'Neal, MA, Kathleen Pitluga, BA, Veronica Sansing, MS, Mary Tranchine, BS, Sharon W. Crow, BS (Statisticians) Marianne (Marnie) Bertolet, PhD, Regina Hardison, MS, Kevin Kip, PhD, Manuel Lombardero, MS, Jiang Lu, MS (Data Managers) Sue Janiszewski, MSIS, Darina Protivnak, MSIS, Sarah Reiser, BS (System Programmers) Stephen Barton, ASB, Ping Guo, BS, Yulia Kushner, BS, BA, Owen Michael, ASB (System Support) Jeffrey P. Martin, MBA, Christopher Kania, BS, Michael Kania, BS, Jeffrey O'Donnell, BS (Consultant) Rae Ann Maxwell, RPh, PhD,

**Mayo Clinic Foundation, Rochester, MN:** (Study Chair) Robert L. Frye, MD **National Heart, Lung and Blood Institute, Bethesda, MD, National Institutes of Health, Bethesda, MD (Program Office):** (Project Officer) Suzanne Goldberg, RN, MSN (Deputy Project Officer) Yves Rosenberg, MD, MPH (NHLBI Officers) Patrice Desvigne-Nickens, MD, Abby Ershow, ScD, David Gordon, MD, PhD, Dina Paltoo, PhD, MPH

**National Institute of Diabetes and Digestive and Kidney Diseases, National Institutes of Health, Bethesda, MD (Co-Funding):** (Program Director for Diabetes Complications) Teresa L. Z. Jones, MD **University of São Paulo Heart Institute, São Paulo, Brazil (Clinical Site):** (Principal Investigators) Cardiology: Whady Hueb, MD, José Ramires, MD, Neuza Lopes, MD; Diabetology: Bernardo Léo Wajchenberg, MD (Investigators) Eulogio E. Martinez, MD, Sergio A. Oliveira, MD, Expedito E. Ribeiro, MD, Marcos Perin, MD (Coordinator) Roberto Betti, MD **Toronto General**



**Hospital/University Health Network, Toronto, Canada (Clinical Site):** (Principal

Investigators) Cardiology: Leonard Schwartz, MD; Diabetology: George Steiner, MD

(Investigators) Alan Barolet, MD, Yolanda Groenewoud, MD (Coordinators) Lisa

Mighton, RN, CDE, Kathy Camelon, RD, CDE **Texas Health Science at San**

**Antonio/South Texas Veterans Health Care System, San Antonio, TX (Clinical**

**Site):** (Principal Investigators) Cardiology: Robert O'Rourke, MD; Diabetology: Janet

Blodgett, MD (Investigators) Edward Sako, MD, PhD (Coordinators) Judith Nicastro, RN,

Robin Prescott, MSN **Mayo Clinic-Rochester Rochester, MN (Clinical Site, Vanguard**

**Site):** (Principal Investigators) Cardiology: Charanjit Rihal, MD; Diabetology: Frank

Kennedy, MD (Investigators) Gregory Barsness, MD, Amanda Basu, MD, Alfredo

Clavell, MD, Robert Frye, MD, David R. Holmes Jr., MD, Amir Lerman, MD, Charles

Mullaney, MD, Guy Reeder, MD, Robert Rizza, MD, Hartzell Schaff, MD, Steven Smith,

MD, Virend Somers, MD, Thoralf Sundt, MD, Henry Ting, MD, R Scott Wright, MD

(Coordinators) Pam Helgemoe, RN, Diane Lesmeister, Deborah Rolbiecki, LPN

**Mexican Institute of the Social Security, México City, D.F., México (Clinical Site):**

(Principal Investigators) Cardiology: Luis Lepe-Montoya, MD; Diabetology, Jorge

Escobedo, MD, FACP (Investigators) Rafael Barraza, MD, Rubén Baleón, MD, Arturo

Campos MD, Paula García, MD, Carlos Lezama, MD, Carlos Miramontes, MD, Salvador

Ocampo, MD, Joaquín V. Peñafiel, MD, Aquiles Valdespino, MD, Raúl Verdín, MD,

Héctor Albarrán, MD, Fernando Ayala, MD, Eduardo Chávez, MD, Héctor Murillo, MD

(Coordinators) Luisa Virginia Buitrón, MD, Beatriz Rico-Verdin, MD, PhD, Fabiola

Angulo, CCT **University Hospitals of Cleveland/CASE Medical School Cleveland,**

**OH (Clinical Site, Vanguard Site):** (Principal Investigators) Cardiology: Dale Adler, MD,

Austin Arthur Halle, MD; Diabetology: Faramarz Ismail-Beigi, MD, PhD (Investigators)

Suvinay Paranjape, MD (Coordinators) Stacey Mazzurco, RN, Karen Ridley, RN, BSN

**Memphis VA Medical Center/University of Tennessee, Memphis, TN (Clinical Site):**

(Principal Investigators) Cardiology: Kodangudi Ramanathan, MD; Diabetology: Solomon Solomon, MD, Nephrology: Barry Wall, MD (Investigators) Darryl Weinman, MD (Coordinators) Tammy Touchstone, RN, BSN, Lillie Douglas, RN **Montréal Heart Institute/Hôtel-Dieu-CHUM Montréal, Canada (Clinical Site, Vanguard Site):**

(Principal Investigators) Cardiology: Martial Bourassa, MD, Jean-Claude Tardif, MD; Diabetology: Jean-Louis Chiasson, MD, Marc Andre Lavoie, MD, Rémi Rabasa-Lhoret, MD, PhD (Coordinators) Hélène Langelier, BSc, RD, Suzy Foucher, RN, BA, Johanne Trudel, RN, BSc **Albert Einstein College of Medicine/Montefiore, Bronx, NY (Clinical Site):** (Principal Investigators) Cardiology: Scott Monrad, MD, Vankeepuram Srinivas, MD; Diabetology: Joel Zonszein, MD (Investigators) Jill Crandall, MD (Coordinators) Helena Duffy, ANP, CDE, Eugen Vartolomei, MD **Fuqua Heart Center/Piedmont Hospital, Atlanta, GA (Clinical Site):** (Principal Investigators) Cardiology: Spencer King III, MD, Carl Jacobs, MD; Diabetology: David Robertson, MD (Coordinators) Marty Porter, PhD, Melanie Eley, RN, CCRC, Emmalee Nichols, BS, CRC, Jennifer LaCorte, RN, BSN, CCRN, Melinda Mock, RN, BSN, MA **University of Alabama at Birmingham, Birmingham, AL (Clinical Site, Vanguard Site):** (Principal Investigators)

Cardiology: William Rogers, MD; Diabetology: Fernando Ovalle, MD, David Bell, MBBCh (Investigators) Vijay K. Misra, MD, William B. Hillegass, MD, Raed Aqel, MD (Coordinators) Penny Pierce, RN, BSN, Melanie Smith, RN, BSN, Leah Saag, RN, Ashley Vaughn, RN, Dwight Smith, RN, Tiffany Grimes, RN, Susan Rolli, RN, Roberta Hill, RN, Beth Dean Barrett, RN, Clarinda Morehead, LPN, Ken Doss **Northwestern University Medical School, Chicago, IL (Clinical Site):** (Principal Investigators)

Cardiology: Charles J. Davidson, MD; Diabetology: Mark Molitch, MD (Investigators) Nirat Beohar, MD (Coordinators) Elaine Massaro, MS, RN, CDE, Lynne Goodreau, RN, Fabiola Arroyo, CCT **Na Homolce Hospital, Prague, Czech Republic, (Clinical Site):** (Principal Investigators) Cardiology: Petr Neužil, MD, PhD, Lenka Pavlickova, MD;

Diabetology: Štěpánka Stehlíková, MD (*Investigators*) Jaroslav Benedik, MD  
(*Coordinator*) Liz Coling **University of Ottawa Heart Institute/Ottawa Hospital-  
Riverside Campus, Ottawa, Canada, (Clinical Site): (Principal Investigators)**

Cardiology: Richard Davies, MD, Christopher Glover, MD, Michel LeMay, MD, Thierry  
Mesana, MD; Diabetology: Teik Chye Ooi, MD, Mark Silverman, MD, Alexander Sorisky,  
MD (*Coordinators*) Colette Favreau, RN, Susan McClinton, BScN **New York Medical  
College/Westchester Medical Center, Valhalla, NY (Clinical Site): (Principal  
Investigators)** Cardiology: Melvin Weiss, MD; Diabetology: Irene Weiss, MD  
(*Investigators*) Leo Saulle, MD, Harichandra Kannam, MD (*Coordinators*) Joanne C.  
Kurylas, RN, CDE, Lorraine Vasi, RN **University, Atlanta, GA (Clinical Site): (Principal  
Investigators)** Cardiology: John Douglas Jr., MD, Ziyad Ghazzal, MD, Laurence Sperling,  
MD, Spencer King, III, MD, Diabetology: Priya Dayamani, MD, Suzanne Gebhart, MD  
(*Investigators*) Sabreena Basu, MD, Tarek Helmy, MD, Vin Tangpricha, MD, PhD  
(*Coordinators*) Pamela Hyde, RN, Margaret Jenkins, RN, CDE, CCRC, Barbara P.  
Grant, CVT **Washington Hospital Center/Georgetown University Medical Center,  
Washington, DC (Clinical Site): (Principal Investigators)** Cardiology: Kenneth Kent,  
MD, William Suddath, MD; Diabetology: Michelle Magee, MD (*Coordinators*) Patricia  
Julien-Williams, CNP, Vida Reed, RN, CDE Carine Nassar, RD, MS, CDE **Québec  
Heart Institute/Laval Hôpital, Sainte-Foy, Canada (Clinical Site): (Principal  
Investigators)** Cardiology: Gilles Dagenais, MD; Diabetology: Claude Garceau, MD  
(*Coordinator*) Dominique Auger, RN **University of British Columbia/Vancouver  
Hospital, British Columbia, Canada (Clinical Site): (Principal Investigators)**

Cardiology: Christopher Buller, MD; Diabetology: Tom Elliott, MBBS, (*Investigators*)  
Krishnan Ramanathan MBChB, Donald Ricci, MD (*Coordinators*) Rebecca Fox, PA,  
MSc, Daniela Kolesniak, MD **NYU School of Medicine, New York, NY (Clinical Site):  
(Principal Investigators)** Cardiology: Michael Attubato, MD, Frederick Feit, MD;

Diabetology: Stephen Richardson, MD (*Investigators*) Ivan Pena Sing, MD, James Slater, MD (*Coordinators*) Angela Amendola, MS, PA-C, RD, CDE ,Bernardo Vargas, BS

***Lahey Clinic Medical Center, Burlington, MA, (Clinical Site, Vanguard Site):***

(*Principal Investigators*) Cardiology: Nicholas Tsapatsaris, MD, Bartholomew Woods, MD; Diabetology: Gary Cushing, MD (*Investigators*) Martin Rutter, MD, Premranjan Singh, MD (*Coordinators*) Gail DesRochers, RN, Gail Woodhead, RN, Deborah Gannon, MS, Nancy Shinopulos Campbell, RN ***University of Virginia, Charlottesville, VA***

***(Clinical Site): (Principal Investigators)*** Cardiology: Michael Ragosta, MD, Ian Sarembock, MD, Eric Powers, MD; Diabetology: Eugene Barrett, MD (*Coordinators*) Linda Jahn, RN, MEd, Karen Murie, RN ***University of Minnesota/Minnesota Veterans Research Institute, Minneapolis, MN (Clinical Site): (Principal Investigators)***

Cardiology: Gladwin Das, MB, BS, MD, Gardar Sigurdsson, MD, Carl White, MD; Diabetology: John Bantle, MD (*Investigator*) J. Bruce Redmon, MD (*Coordinator*) Christine Kwong, MPH, RD, CDE ***St. Luke's/Roosevelt Hospital Center, New York, NY (Clinical Site): (Principal Investigators)*** Cardiology: Jacqueline Tamis-Holland, MD;

Diabetology: Jeanine Albu, MD (*Investigators*) Judith S. Hochman, MD, James Slater, MD, James Wilentz, MD (*Coordinators*) Sylvaine Frances, PA, Deborah Tormey, RN ***University of Florida, Gainesville, FL (Clinical Site): (Principal Investigators)***

Cardiology: Carl Pepine, MD, Karen Smith, MD; Endocrinology: Laurence Kennedy, MDFRCP (*Coordinators*) Karen Brezner, CCRC, Tempa Curry, RN ***Saint Louis University, St. Louis, MO (Clinical Site): (Principal Investigators)*** Cardiology: Frank

Bleyer, MD; Diabetology: Stewart Albert, MD (*Investigator*) Arshag Mooradian, MD, (*Coordinator*) Sharon Plummer, NP ***University of Texas at Houston, Houston, TX (Clinical Site): (Principal Investigators)*** Cardiology: Francisco Fuentes, MD, Roberto

Robles, MD; Diabetology: Victor Lavis, MD (*Investigators*) Jaime Gomez, MD, Cesar Iliescu, MD (*Coordinators*) Carol Underwood, BSN, RN, CCRC, Maria Selin Fulton, RN,

CDE, Julie Gomez Ramirez, BSN, RN, Jennifer Merta, MA, Glenna Scott, RN **Kaiser-Permanente Medical Center, San Jose, CA (Clinical Site):** (Principal Investigators) Cardiology: Ashok Krishnaswami, MD; Diabetology: Lynn Dowdell, MD (Coordinator) Sarah Berkheimer, RN **Henry Ford Heart & Vascular Institute, Detroit, MI (Clinical Site):** (Principal Investigators) Cardiology: Adam Greenbaum, MD; Diabetology: Fred Whitehouse, MD (Coordinators) Raquel Pangilinan, BSN, RN, Kelly Mann, RN, BSN, CDE **Boston Medical Center, Boston, MA (Clinical Site):** (Principal Investigators) Cardiology: Alice K. Jacobs, MD; Diabetology: Elliot Sternthal, MD (Investigators) Susana Ebner, MD, Zoran Nedeljkovic, MD (Coordinator) Paula Beardsley, LPN **Fletcher Allen Health Care (Vanguard Site), Burlington, VT (Clinical Site):** (Principal Investigators) Cardiology: David Schneider, MD; Diabetology: Richard Pratley, MD, William Cefalu, MD, Joel Schnure, MD (Coordinators) Michaelanne Rowen, RN, CCRC, Linda Tilton, MS, RD, DE **Jim Moran Heart & Vascular Institute, Fort Lauderdale, FL (Clinical Site):** (Principal Investigators) Cardiology: Alan Niederman, MD; Diabetology: Cristina Mata, MD (Coordinator) Terri Kellerman, RN **Baylor College of Medicine, Houston, TX (Clinical Site):** (Principal Investigators) Cardiology: John Farmer, MD; Diabetology: Alan J. Garber, MD, PhD (Investigators) Neal Kleiman, MD (Coordinators) Nancy Howard, RN, BSN, Debra Nichols, RN, Madonna Pool, RN, MSN **Duke University, Durham, NC (Clinical Site):** (Principal Investigators) Cardiology: Christopher Granger, MD; Diabetology: Mark Feinglos, MD (Investigators) George Adams, MD, Jennifer Green, MD (Coordinators) Bernadette Druken, RN, CCRP, Dani Underwood, MSN, ANP **University of Maryland Hospital, Baltimore, MD (Clinical Site):** (Principal Investigators) Cardiology: J. Lawrence Stafford, MD; Diabetology: Thomas Donner, MD (Investigator) Warren Laskey, MD (Coordinator) Dana Beach, RN **University of Chicago Medical Center, Chicago, IL (Clinical Site):** (Principal Investigators) Cardiology: John Lopez, MD; Diabetology: Andrew Davis, MD

(Investigators) David Faxon, MD, Sirimon Reutrakul, MD (Coordinator) Emily Bayer, RN, BSN **University of Pittsburgh Medical Center, Pittsburgh, PA (Clinical Site, Vanguard Site):** (Principal Investigators) Cardiology: Oscar Marroquin, MD, Howard Cohen, MD; Diabetology: Mary Korytkowski, MD (Coordinators) Glory Koerbel, MSN, CDE, Lisa Baxendell, RN, Debbie Rosenfelder, BSN, CCRC, Louise DeRiso, MSN, Carole Farrell, BSN, Tina Vita, RN **Washington University/Barnes Jewish Hospital, St. Louis, MO (Clinical Site):** (Principal Investigators) Diabetology: Janet McGill, MD; Cardiology: Ronald Krone, MD, Richard Bach, MD (Coordinators) Carol Recklein, RN, MHS, CDE, Kristin M. Luepke, RN, MSN, Mary Jane Clifton **Mount Sinai Medical Center, New York, NY (Clinical Site):** (Principal Investigators) Cardiology: Michael E. Farkouh, MD, MSc, Michael C. Kim, MD, FACC; Diabetology: Donald A. Smith, MD, MPH (Coordinators) Ida Guzman, RN, ANP, Arlene Travis, RN, MSN, **Mid America Heart Institute, Kansas City, MO (Clinical Site):** (Principal Investigators) Cardiology: James O'Keefe, MD; Diabetology: Alan Forker, MD, William Isley, MD<sup>†</sup> (Investigator) Richard Moe, MD, PhD (Coordinators) Paul Kennedy, RN, Margaret Rosson, LPN, Aimee Long, RN **University of Michigan, Ann Arbor, MI (Clinical Site):** (Principal Investigators) Cardiology: Eric Bates, MD; Diabetology: William Herman, MD, MPH, Rodica Pop-Busui, MD, PhD (Investigators) Claire Duvernoy, MD, Martin Stevens, MBCh (Coordinators) Ann Luciano, RN, Cheryl Majors, BSN **Johns Hopkins Bayview Medical Center, Baltimore, MD (Clinical Site):** (Principal Investigators) Cardiology: Sheldon H. Gottlieb, MD; Diabetology: Annabelle Rodriguez, MD (Coordinator) Melanie Herr, RN **Brown University/Rhode Island Hospital, Providence, RI (Clinical Site):** (Principal Investigators) Cardiology: David Williams, MD; Diabetology: Robert J. Smith, MD (Investigators), J. Dawn Abbott, MD, Marc J. Laufgraben, MD (Coordinators) Mary Grogan, RN, Janice Muratori, RNP **Houston VA Medical Center, Houston, TX (Clinical Site):** (Principal Investigators) Cardiology:

Gabriel Habib, MD, MS; Diabetology: Marco Marcelli, MD (*Investigators*) Issam Mikati, MD (*Coordinators*) Emilia Cordero, NP, Gina Caldwell, LVN **New York Hospital Queens /Lang Research Center, Queens, NY (Clinical Site):** (*Principal Investigators*) Cardiology: David Schechter, MD; Diabetology: Daniel Lorber, MD; Nephrology: Phyllis August, MD, MPH (*Coordinators*) Maisie Brown, RN, MSN, Patricia Depree, PhD, ANP, CDE **Wilhelminen Hospital, Vienna, Austria (Clinical Site):** (*Principal Investigators*) Cardiology: Kurt Huber, MD; Diabetology: Ursula Hanusch-Enserer, MD (*Investigators*) Nelly Jordanova, MD (*Coordinators*) Dilek Cilesiz, MD, Birgit Vogel, MD **St. Joseph Mercy Hospital/Michigan Heart and Vascular Institute and the Ann Arbor Endocrinology and Diabetes, P.C., Ann Arbor, MI (Clinical Site):** (*Principal Investigators*) Cardiology: Ben McCallister Jr., MD; Diabetology: Michael Kleerekoper, MD, Kelly Mandagere, MD, Robert Urbanic, MD (*Investigators*) James Bengston, MD, MPH, Bobby K. Kong, MD, Andrew Pruitt, MD, Jeffrey Sanfield, MD (*Coordinators*) Carol Carulli, RN, Ruth Churley-Strom, MSN **The Ohio State University Medical Center, Columbus, OH (Clinical Site):** (*Principal Investigators*) Cardiology: Raymond Magorien, MD; Diabetology: Kwame Osei, MD (*Coordinators*) Cecilia Casey Boyer, RN, MS, CDE **Mayo Clinic-Scottsdale, Scottsdale, AZ (Clinical Site):** (*Principal Investigators*) Cardiology: Richard Lee, MD; Diabetology: Pasquale Palumbo, MD (*Coordinator*) Joyce Wisbey, RN **Angiographic Core Laboratory, Stanford University, Stanford, CA:** (*Principal Investigator*) Edwin Alderman, MD (*Staff*) Fumiaki Ikeno, MD, Anne Schwarzkopf<sup>†</sup> **Biochemistry Core Laboratory, University of Minnesota, Minneapolis, MN:** (*Principal Investigator*) Michael Steffes, MD, PhD (*Staff*) Maren Nowicki, CLS, Jean Buckska, CLS **ECG Core Laboratory, Saint Louis University, St. Louis, MO (U01 HL061746):** (*Principal Investigator*) Bernard Chaitman, MD (*Staff*) Jane Eckstein, RN, Karen Stocke, BS, MBA **Economics Core Laboratory, Stanford University, Stanford, CA (U01 HL061748):** (*Principal Investigator*) Mark A. Hlatky, MD (*Staff*) Derek B.

Boothroyd, PhD, Kathryn A. Melsop, MS **Fibrinolysis Core Laboratory, University of Vermont, Burlington, VT (U01 HL063804):** (Principal Investigator) Burton E. Sobel, MD (Staff) Michaelanne Rowen, RN, CCRC, Dagnija Neimane, BS **Nuclear Cardiology Core Laboratory, University of Alabama at Birmingham, Birmingham, AL (Astellas Pharma US, Inc.):** (Principal Investigator) Ami E. Iskandrian, MD (Staff) Mary Beth Schaaf, RN, BSN **Diabetes Management Center, Case Western Reserve University, Cleveland, OH:** (Director) Saul Genuth, MD (Staff) Theresa Bongarno, BS, **Hypertension Management Center, Lahey Clinic Medical Center, Burlington, MA:** (Co-Director) Richard Nesto, MD **Hypertension Management Center, New York Hospital Queens, Queens, NY:** (Co-Director) Phyllis August, MD, MPH (Staff) Karen Hultberg, MS **Lifestyle Intervention Management Center, Johns Hopkins Bayview Medical Center, Baltimore, MD:** (Co-Director) Sheldon H. Gottlieb, MD **Lifestyle Intervention Management Center, St. Luke's/Roosevelt Hospital Center, New York, NY:** (Co-Director) Jeanine Albu, MD (Staff) Helene Rosenhouse-Romeo, RD, CDE **Lipid Management Center, University of Pittsburgh, Pittsburgh, PA:** (Director) Trevor J. Orchard, MBBCh, MMedSci (Staff) Georgia Pambianco, MPH, Manuel Lombardero, MS **Safety Officer, North Canton, OH:** Michael Mock, MD **Operations Committee:** (Chair) Robert L. Frye, MD (Members) Maria Mori Brooks, PhD, Patrice Desvigne-Nickens, MD, Abby Ershow, ScD, Saul Genuth, MD, Suzanne Goldberg, RN, MSN, David Gordon, MD, PhD, Regina Hardison, MS, Teresa L. Z. Jones, MD, Sheryl Kelsey, PhD, Richard Nesto, MD, Trevor Orchard, MBBCh, MMedSci, Dina Paltoo, PhD, MPH, Yves Rosenberg, MD, MPH **Morbidity and Mortality Classification Committee (MMCC):** (Chair) Thomas Ryan, MD (Co-Chair) Harold Lebovitz, MD (Members) Robert Brown, MD, Gottlieb Friesinger, MD, Edward Horton, MD, Jay Mason, MD, Renu Virmani, MD, Lawrence Wechsler, MD **Data and Safety Monitoring Board (DSMB):** (Chair) C. Noel Bairey-Merz, MD (former Chair) J. Ward Kennedy, MD<sup>†</sup> (Executive Secretary) David



Gordon, MD, PhD (*Members*) Elliott Antman, MD, John Colwell, MD, PhD, Sarah Fowler,  
PhD, Curt Furberg, MD, PhD, Lee Goldman, MD, Bruce Jennings, MA, Scott Rankin,  
MD.

†Deceased
